# Supplementary material for: DNAJB3 attenuates ER stress through direct interaction with AKT
Source: PubMed Central journal article supplement (PMC10437922; doi:10.1371/journal.pone.0290340), 2023-08-18

Original Gels and Blots:

Figure 1.

Figure 1 (a) original

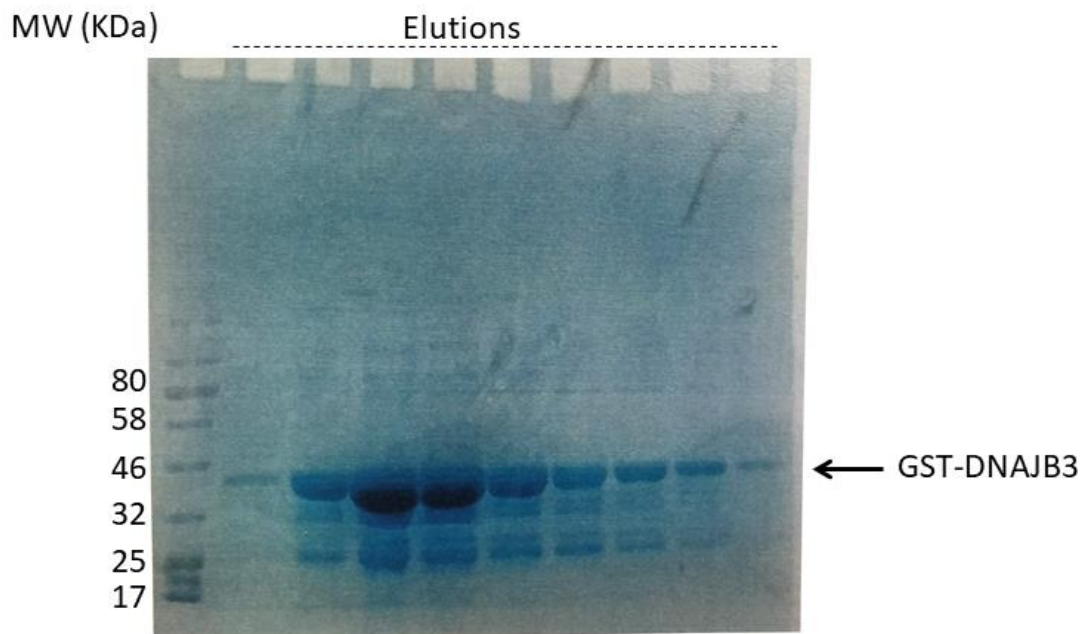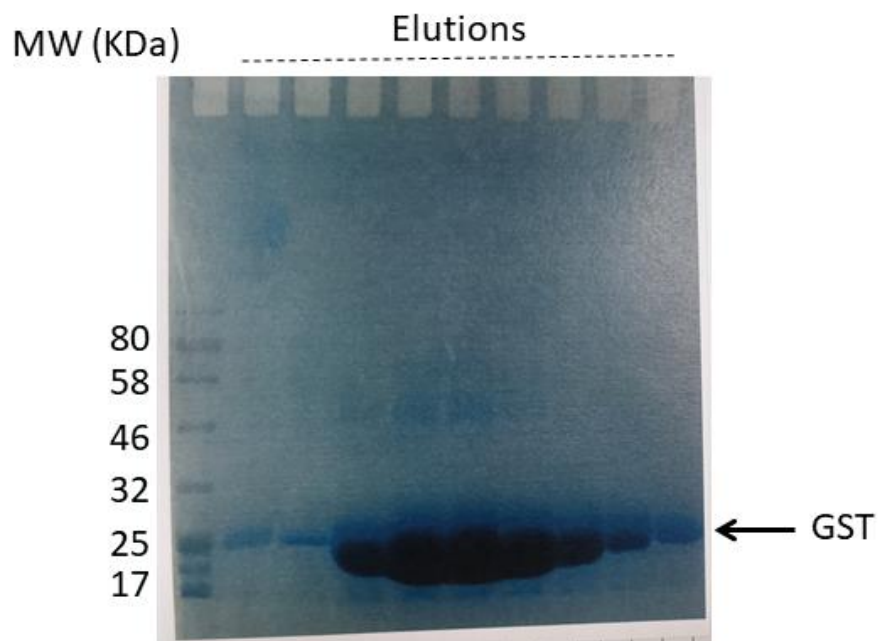

Figure 1 (b) original

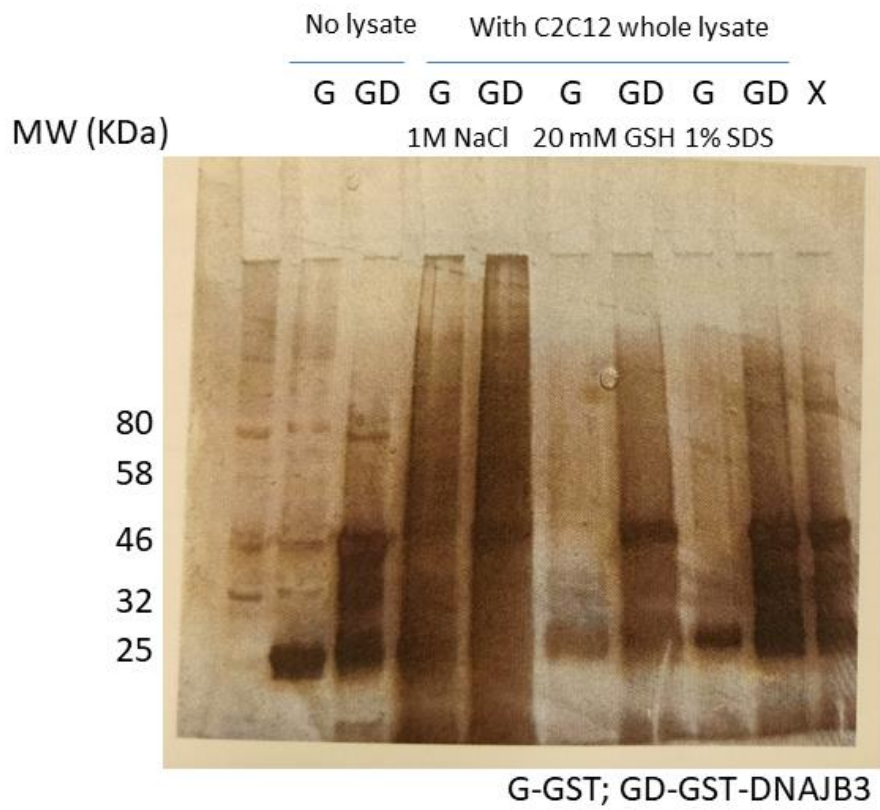

Supplement: pone.0290340.s001.pdf [file pone.0290340.s001.pdf]
